# Supplementary material for: Prussian blue modified iron oxide magnetic nanoparticles and their high peroxidase-like activity
Source: Royal Society of Chemistry journal article supplement (doi:10.1039/c0jm00174k), 2010-01-01
Supplement: c0jm00174k.pdf [file c0jm00174k.pdf]

## Supporting information

### Prussian blue modified iron oxide magnetic nanoparticles and their high peroxidase-like activity

Xiao-Qing Zhang,<sup>a</sup> Shang-Wenyan Gong,<sup>a</sup> Yu Zhang,<sup>\*a</sup> Ting Yang,<sup>b</sup> Chun-Yu Wang<sup>b</sup>  
and Ning Gu<sup>\*a</sup>

<sup>a</sup> Jiangsu key Laboratory for Biomaterials and Devices, State Key Laboratory of Bioelectronics, School of Biological Science and Medical Engineering, Southeast University, Nanjing, P.R. China.

<sup>b</sup> School of Chemistry and Chemical Engineering, Southeast University, Nanjing, P.R. China.

\*Corresponding authors: [zhangyu@seu.edu.cn](mailto:zhangyu@seu.edu.cn); [guning@seu.edu.cn](mailto:guning@seu.edu.cn).

**Table S1** Experimental conditions of control groups and positive groups for IgG based immunoassay.

|                       | blank control 1 | blank control 2 | negative control | positive groups   |     |   |     |
|-----------------------|-----------------|-----------------|------------------|-------------------|-----|---|-----|
| IgG incubating        | ×               | CB              | CB               | IgG in CB (µg/mL) |     |   |     |
|                       |                 |                 |                  | 1                 | 1.5 | 2 | 2.5 |
| BCS blocking          | ×               | 10% BCS         | 10% BCS          | 10% BCS           |     |   |     |
| PBMNPs-SPA incubating | ×               | 1% BSA          | PBMNPs-SPA       | PBMNPs-SPA        |     |   |     |

× indicates the 96 wells were with no treatment. CB, BCS, BSA and SPA are abbreviations for carbonate buffer, bovine calf serum, bovine serum albumin and Staphylococcal protein A, respectively.

**Table S2** Atom and weight ratio for nitrogen to iron (N/Fe) in PBMNPs1, PBMNP s2 and PBMNPs3.

| Sample  | Atom ratio | Weight ratio |
|---------|------------|--------------|
|         | (N/Fe)     | (N/Fe)       |
| PBMNPs1 | 0.58       | 0.15         |
| PBMNPs2 | 1.12       | 0.28         |
| PBMNPs3 | 1.43       | 0.36         |

**Figure S1** Average hydrodynamic diameter for PBMNPs3.

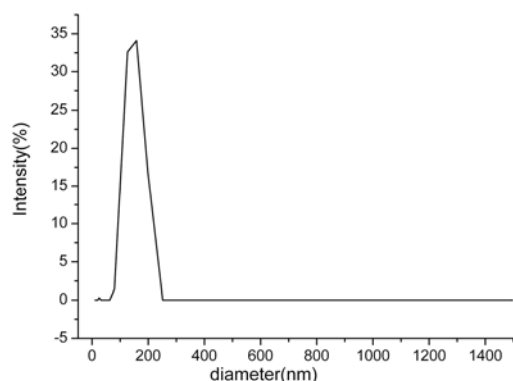

**Figure S2** UV-vis spectra for PBMNPs3 (a) before and (b) after colorful reactions.

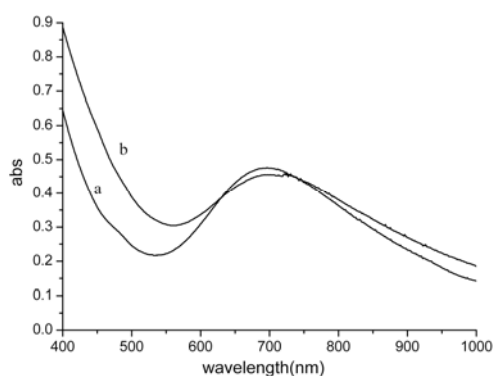

**Figure S3** FTIR spectrum of PBMNPs conjugated with SPA.

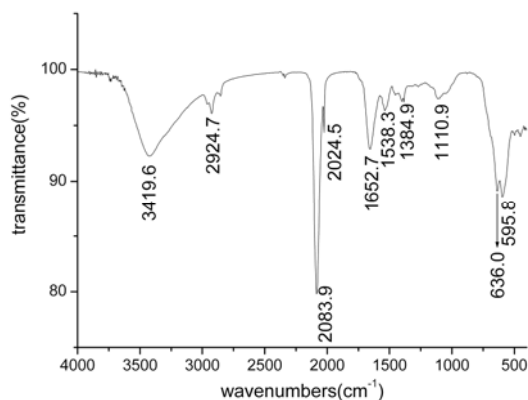

The spectrum represents the typical IR absorption of protein A conjugated PBMNPs. The peaks at about  $600\text{cm}^{-1}$  and  $2083\text{cm}^{-1}$  are attributed to PBMNPs. The typical IR characteristic absorption bands of proteins can be observed, including strong typical amide I and amide II bands (mainly stretching C=O and bending N-H in peptides, respectively at  $1652.7$  and  $1538.4\text{cm}^{-1}$ ), as well as symmetric and antisymmetric vibration bands of  $\text{CH}_2$  and  $\text{CH}_3$  groups of amino acid side chains (at the range of  $3000$  and  $2800\text{cm}^{-1}$ ).
